# Supplementary material
Source: publisher site journal article supplement (https://www.dovepress.com/article/598462)
Supplement: Supplementary file 1 [file 598462%20Supplementary%20Material.docx]

| Supplementary Table S1: PubMed search strategy | | |
| --- | --- | --- |
| **Search number** | **Query** | **Filters** |
| 1 | "Renal Dialysis"[Majr] |  |
| 2 | "Caregivers"[Majr] |  |
| 3 | (((((((((Renal Dialysis[Title/Abstract]) OR (Dialyses, Renal[Title/Abstract])) OR (Renal Dialyses[Title/Abstract])) OR (Dialysis, Renal[Title/Abstract])) OR (Hemodialysis[Title/Abstract])) OR (Hemodialyses[Title/Abstract])) OR (Dialysis, Extracorporeal[Title/Abstract])) OR (Dialyses, Extracorporeal[Title/Abstract])) OR (Extracorporeal Dialyses[Title/Abstract])) OR (Extracorporeal Dialysis[Title/Abstract]) |  |
| 4 | (((((((((((((((((Caregivers[Title/Abstract]) OR (Caregiver[Title/Abstract])) OR (Carers[Title/Abstract])) OR (Carer[Title/Abstract])) OR (Care Givers[Title/Abstract])) OR (Care Giver[Title/Abstract])) OR (Spouse Caregivers[Title/Abstract])) OR (Caregiver, Spouse[Title/Abstract])) OR (Caregivers, Spouse[Title/Abstract])) OR (Spouse Caregiver[Title/Abstract])) OR (Family Caregivers[Title/Abstract])) OR (Caregiver, Family[Title/Abstract])) OR (Caregivers, Family[Title/Abstract])) OR (Family Caregiver[Title/Abstract])) OR (Informal Caregivers[Title/Abstract])) OR (Caregiver, Informal[Title/Abstract])) OR (Caregivers, Informal[Title/Abstract])) OR (Informal Caregiver[Title/Abstract]) |  |
| 5 | 1 OR 3 |  |
| 6 | 2 OR 4 |  |
| 7 | "Psychotherapy"[Majr] |  |
| 8 | "Patient Education as Topic"[Majr] |  |
| 9 | "Adaptation, Psychological"[Majr] |  |
| 10 | "Behavior Therapy/education"[Majr] |  |
| 11 | ((((Psychoeducation*[Title/Abstract]) OR (psychotherap*[Title/Abstract])) OR (psycho*[Title/Abstract])) OR (psycho-education*[Title/Abstract])) OR (psycho-social[Title/Abstract]) |  |
| 12 | 5 OR 6 |  |
| 13 | 7 OR 8 OR 9 OR 10 OR 11 |  |
| 14 | "Quality of Life"[Majr] |  |
| 15 | "Depression"[Majr] |  |
| 16 | "Dysthymic Disorder"[Majr] |  |
| 17 | "Anxiety"[Majr] |  |
| 18 | "Patient Satisfaction"[Majr] |  |
| 19 | "Mental Health"[Majr] |  |
| 20 | "Caregiver Burden"[Mesh] |  |
| 21 | "Social Support"[Majr] |  |
| 22 | 14 OR 15 OR 16 OR 17 OR 18 OR 19 OR 20 OR 21 |  |
| 23 | 12 AND 13 AND 22 | Randomized Controlled Trial |

| Supplementary Table S2: Mediation path coefficients for APIMeM of adaptive coping (N=200) | | | | | | | |
| --- | --- | --- | --- | --- | --- | --- | --- |
| Effect | | | Path | Effect size | 95%CI | | *P* |
| upper | lower |
| Actor effect | | | | | | | |
|  | Patient | | | | | | |
|  |  | Total effect |  | 0.512 | 0.419 | 0.611 | 0.001 |
|  |  | Total indirect effect |  | 0.288 | 0.206 | 0.390 | 0.001 |
|  |  | Actor-actor single indirect effect | Patients' social support - patients' adaptive coping - patients' quality of life | 0.236 | 0.154 | 0.333 | 0.001 |
|  |  | Partner-partner single indirect effect | Patients' social support - caregivers' adaptive coping - patients' quality of life | 0.052 | 0.017 | 0.103 | 0.004 |
|  |  | Direct effect | Patients' social support - patients' quality of life | 0.224 | 0.109 | 0.346 | 0.001 |
|  | Caregiver | | | | | | |
|  |  | Total effect |  | -0.188 | -0.284 | -0.09 | 0.001 |
|  |  | Total indirect effect |  | -0.047 | -0.110 | 0.003 | 0.064 |
|  |  | Actor-actor single indirect effect | Caregivers’ social support - caregivers’ adaptive coping - caregiver burden | 0.006 | -0.008 | 0.031 | 0.346 |
|  |  | Partner-partner single indirect effect | Caregivers' social support - patients’ adaptive coping - caregiver burden | -0.053 | -0.116 | -0.001 | 0.038 |
|  |  | Direct effect | Caregivers' social support - caregiver burden | -0.141 | -0.224 | -0.06 | 0.001 |
| Partner effect | | | | | | | |
|  | Patient | | | | | | |
|  |  | Total effect |  | 0.306 | 0.179 | 0.437 | 0.001 |
|  |  | Total indirect effect |  | 0.067 | 0.016 | 0.123 | 0.016 |
|  |  | Actor-partner single indirect effect | Caregivers’ social support - caregivers’ adaptive coping -patients' quality of life | 0.05 | 0.005 | 0.103 | 0.036 |
|  |  | Partner-actor single indirect effect | Caregivers’ social support - patients' adaptive coping - patients' quality of life | 0.017 | 0.002 | 0.048 | 0.021 |
|  |  | Direct effect | Caregivers’ social support - patients' quality of life | 0.239 | 0.112 | 0.366 | 0.002 |
|  | Caregiver | | | | | | |
|  |  | Total effect |  | -0.611 | -0.705 | -0.514 | 0.001 |
|  |  | Total indirect effect |  | -0.136 | -0.224 | -0.040 | 0.005 |
|  |  | Actor-partner single indirect effect | Patients' social support - patients' adaptive coping - caregiver burden | 0.028 | -0.048 | 0.103 | 0.482 |
|  |  | Partner-actor single indirect effect | Patients' social support - caregivers' adaptive coping - caregiver burden | -0.164 | -0.236 | -0.103 | 0.001 |
|  |  | Direct effect | Patients' social support - caregiver burden | -0.475 | -0.599 | -0.358 | 0.001 |
